# Supplementary material for: Natural Stabilizers and Nanostructured Lipid Carrier Entrapment for Photosensitive Compounds, Curcumin and Capsaicin
Source: MDPI journal article supplement (doi:10.3390/pharmaceutics16030412), 2024-03-17
Supplement: s1 [file s1]

Supplementary Materials:

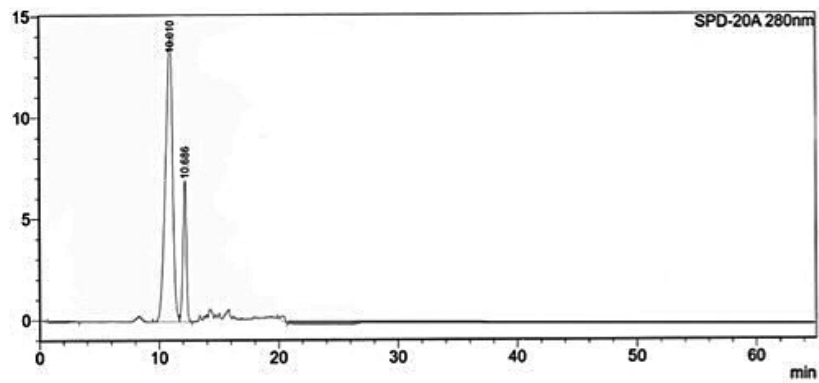

(a) Capsaicin

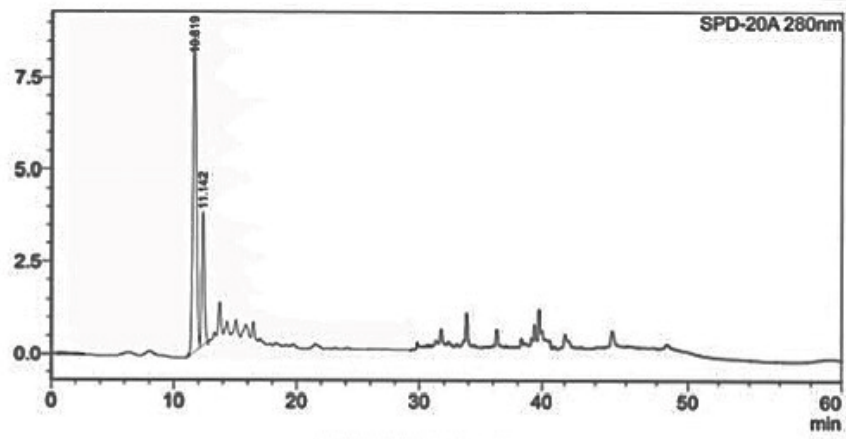

(b) Chili extract

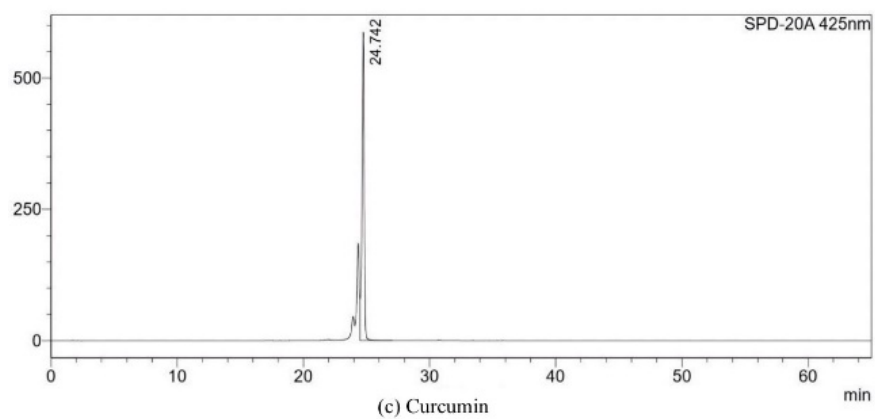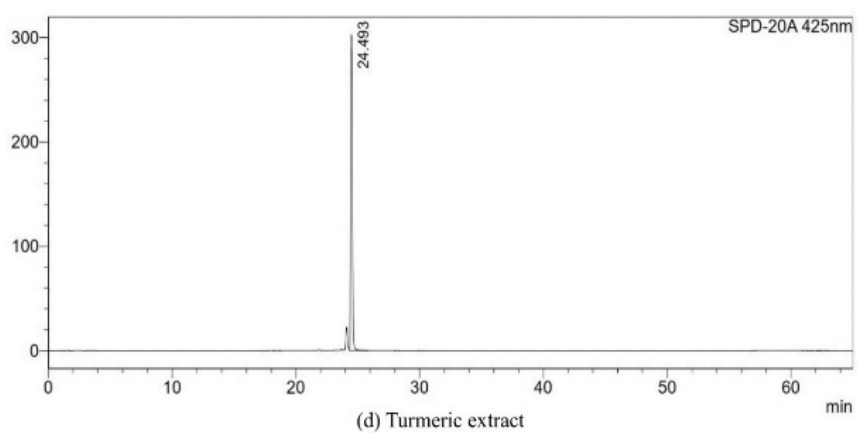

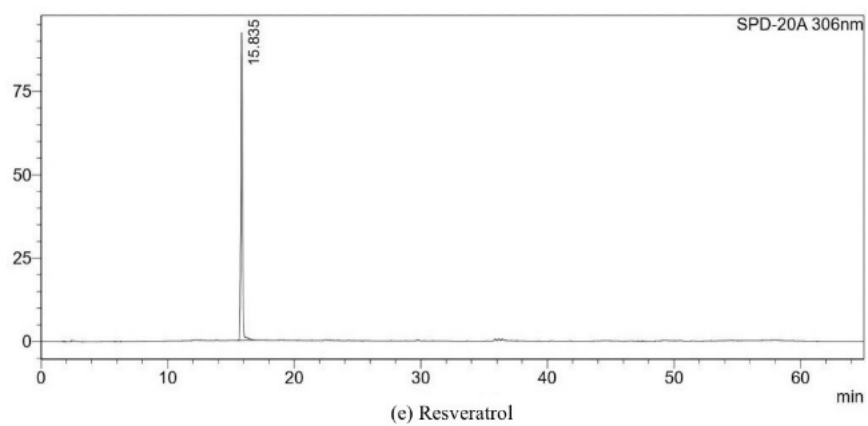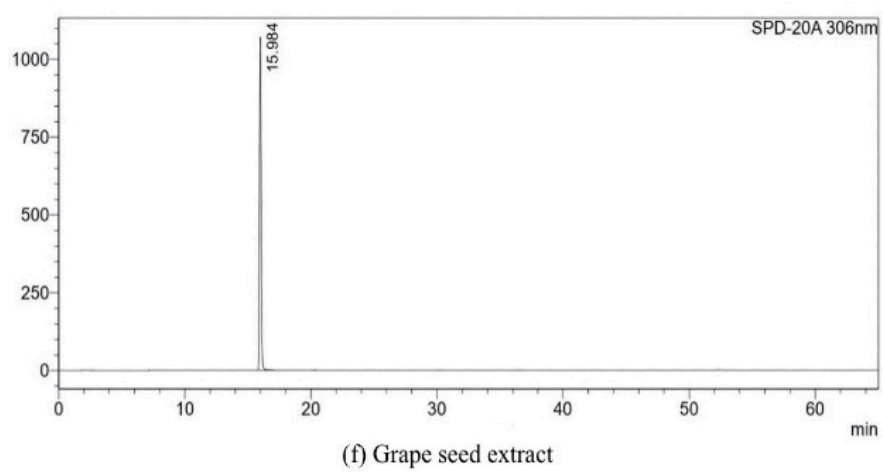

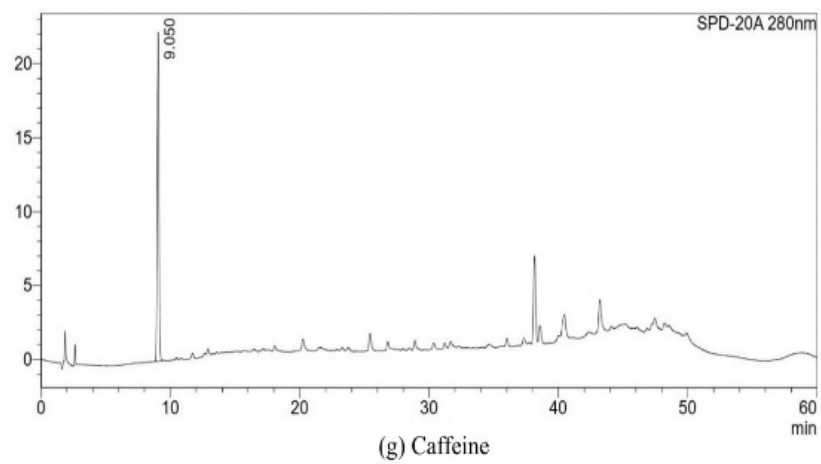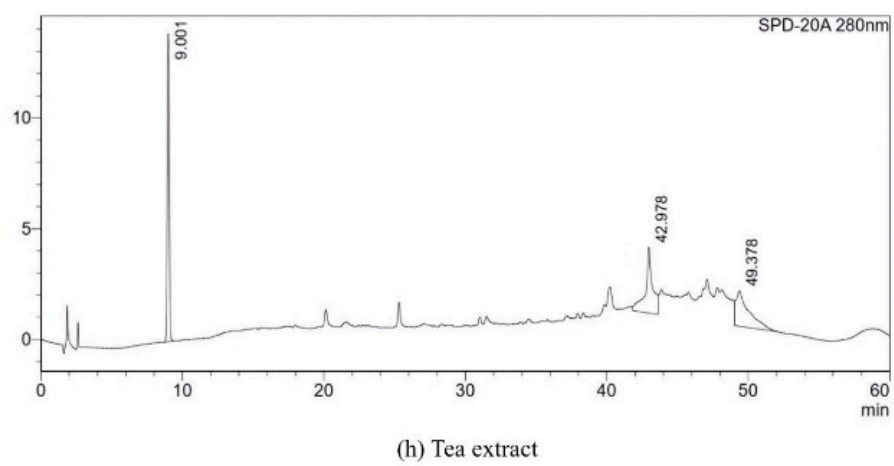

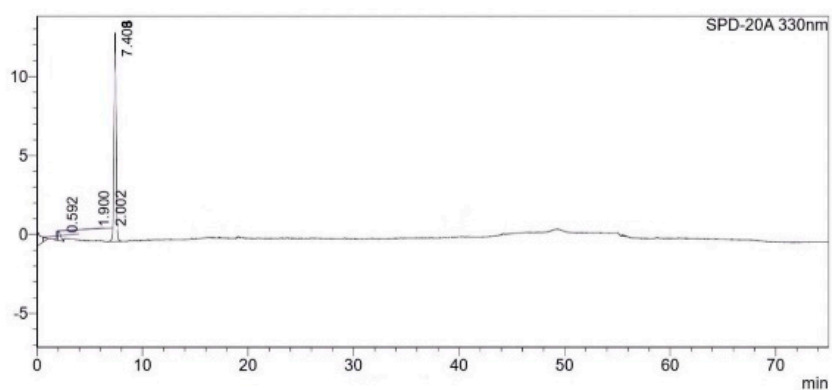

(i) Chlorogenic acid Standard

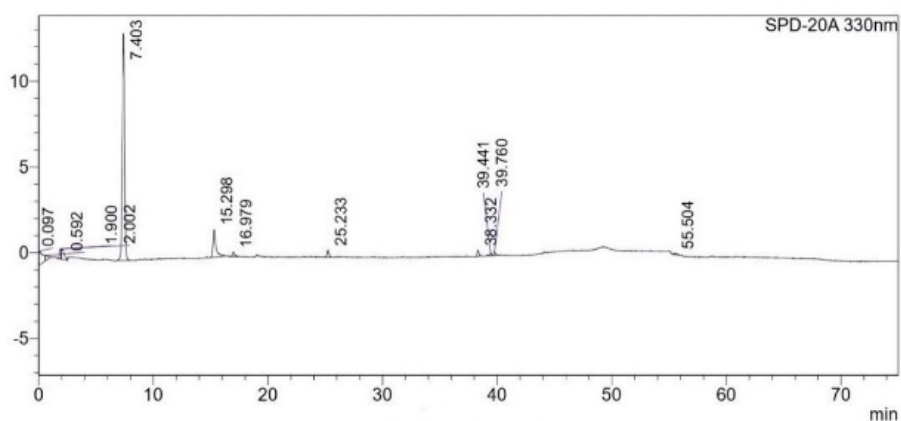

(j) Chlorogenic acid

**Figure S1.** HPLC chromatograms of capsaicin (a), chili extract (b), curcumin (c), turmeric extract (d), resveratrol (e), grape seed extract (f), caffeine (g), tea extract (h), chlorogenic acid standard (i) and chlorogenic acid (j).

**Table S1** Solubility of extracts in natural oils.

| Extract/Compound | Oil           | Volume (mL) of solvent that can dissolve<br>0.0010 g of solute | Solubility        |
|------------------|---------------|----------------------------------------------------------------|-------------------|
| Turmeric         | Sunflower oil | 1                                                              | Freely soluble    |
| Chili            |               | 1                                                              | Freely soluble    |
| Tea              |               | 5                                                              | Sparingly soluble |
| Chlorogenic acid |               | 1                                                              | Freely soluble    |
| Grape seed       |               | 1                                                              | Freely soluble    |
| Turmeric         |               | 1                                                              | Freely soluble    |

|                  |             |   |                   |
|------------------|-------------|---|-------------------|
| Chili            | Olive oil   | 1 | Freely soluble    |
| Tea              |             | 5 | Sparingly soluble |
| Chlorogenic acid |             | 2 | Soluble           |
| Grape seed       |             | 1 | Freely soluble    |
| Turmeric         | Coconut oil | 5 | Sparingly soluble |
| Chili            |             | 5 | Sparingly soluble |
| Tea              |             | 5 | Sparingly soluble |
| Chlorogenic acid |             | 5 | Sparingly soluble |
| Grape seed       |             | 1 | Freely soluble    |

**Table S2** Characterizations of extract mixtures loaded NLCs.

| Extract mixtures loaded NLCs    Mean $\pm$ SD |                   |                 |                     |
|-----------------------------------------------|-------------------|-----------------|---------------------|
|                                               | Size (nm)         | PDI             | Zeta potential (mV) |
| Day 0                                         | 153.73 $\pm$ 1.97 | 0.25 $\pm$ 0.00 | -104.33 $\pm$ 2.52  |
| Day 30                                        | 152.63 $\pm$ 2.41 | 0.21 $\pm$ 0.00 | -60.27 $\pm$ 1.56*  |

Asterisk (\*) is significantly different at  $p < 0.05$  when compared between day 0 and Day 30 that calculated by Paired sample T-test by the SPSS program.

**Table S3** Percent entrapment efficiency and percent loading capacity (%LC) of extract mixtures loaded NLCs.

| Compound  | %EE $\pm$ SD     | %LC $\pm$ SD    |
|-----------|------------------|-----------------|
| Capsaicin | 95.94 $\pm$ 0.05 | 0.56 $\pm$ 0.00 |
| Curcumin  | 97.79 $\pm$ 0.36 | 0.29 $\pm$ 0.00 |
